# Supplementary material for: A “wave-riding” biocatalysis: an all-enzyme system for genuinely green and flexible manufacture of machine-washable dyed wool fabrics
Source: Royal Society of Chemistry journal article supplement (doi:10.1039/d5gc01614b), 2025-01-01
Supplement: d5gc01614b7.pdf [file d5gc01614b7.pdf]

## Supplementary information

# A “wave-riding” biocatalysis: all-enzyme system toward genuine-green and flexible manufacture of machine-washable dyed wool fabrics

Xinrui Zhang, Jun Wang, Man Zhou, Yuanyuan Yu, Ping Wang and Qiang Wang\*

Key Laboratory of Eco-Textile, Ministry of Education, Jiangnan University, Wuxi,  
214122 Jiangsu, China. E-mail: qiangwang@jiangnan.edu.cn.

## 1. Fig. S1 to S5

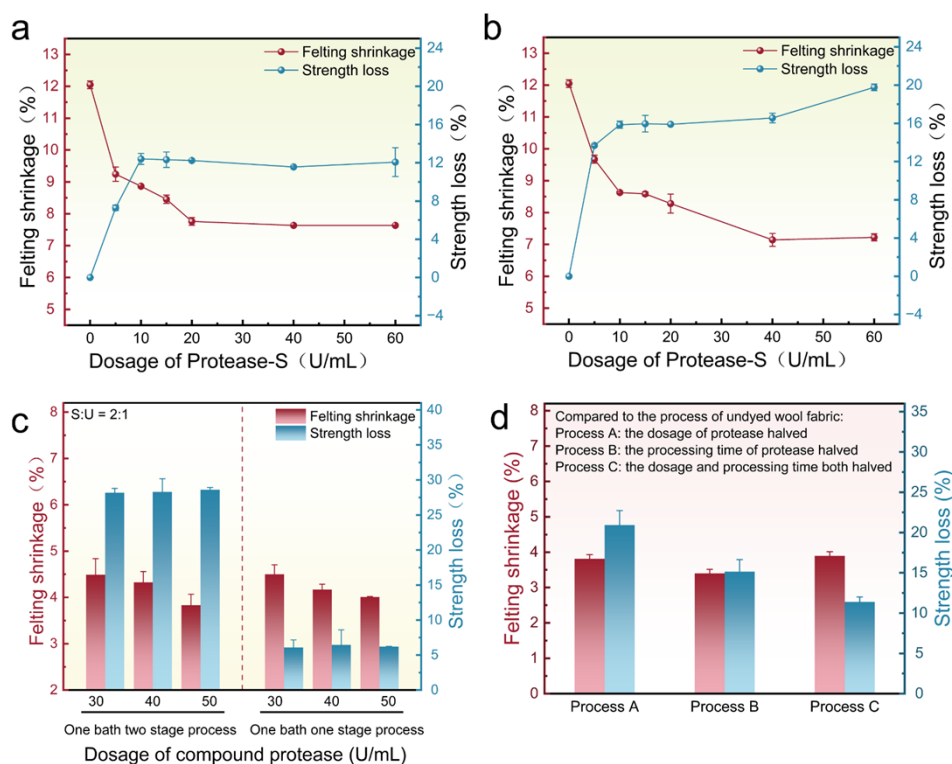

**Fig. S1** Optimization of the fully enzymatic method for anti-felt shrinkage of dyed wool fabrics. (a, b) The effect of S and U dosages on the felting property and strength loss of wool fabrics; (c) The adjustment of the dosage of compound protease system in one bath process on wool fabrics' felting shrinkage and strength loss; (d) The optimization of the anti-felting process on dyed wool fabric.

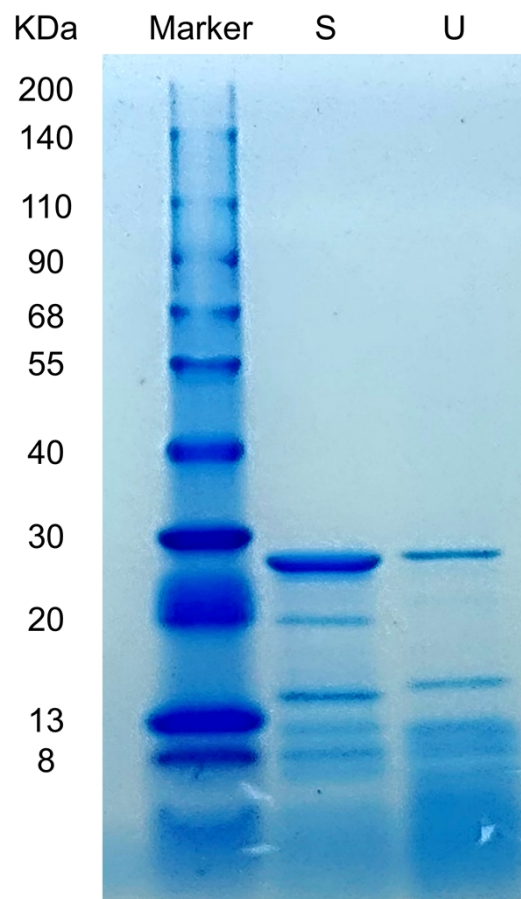

**Fig. S2** Molecular weight of S and U.

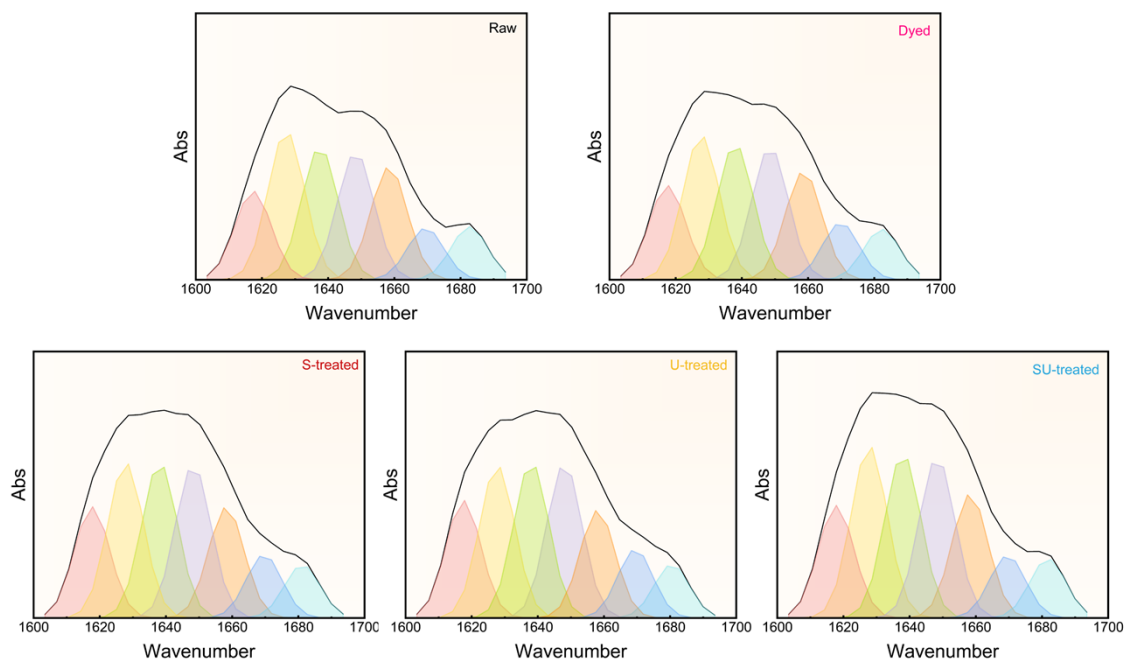

**Fig. S3** Peak fitting spectrum of amide I of FTIR from different samples.

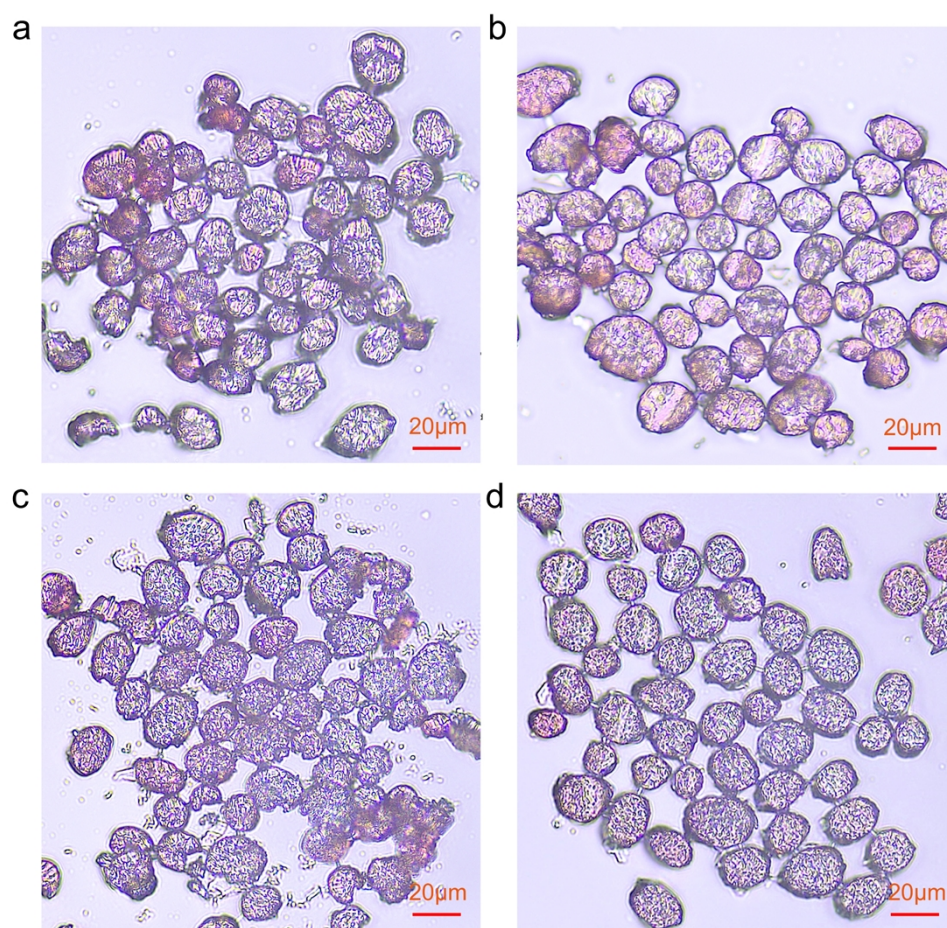

**Fig. S4** The cross-sectional images of wool fabrics treated with different processes. (a) Dyed wool; (b) S-treated; (c) U-treated; (d) SU-treated.

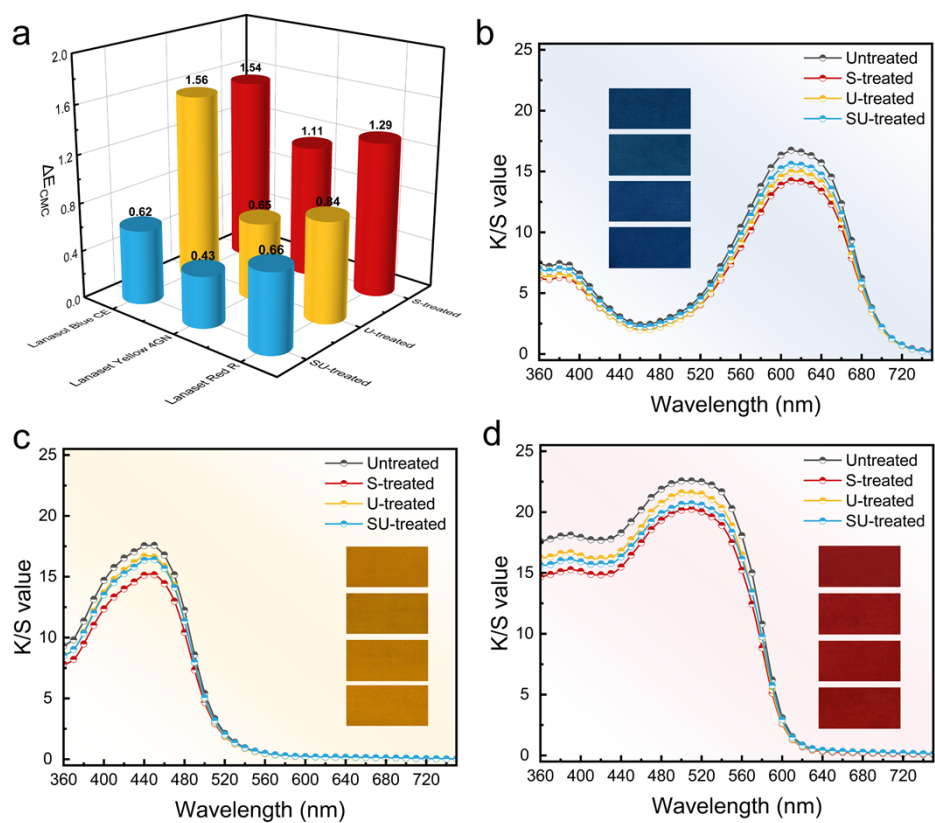

**Fig. S5** (a) The chromatic aberration between untreated dyed wool fabrics and protease-treated samples; (b, c, d) The K/S value curves of the other three dyed wool fabrics and treated samples.

2. Table. S1

| Table. S1 The effects of enzyme treatment on the color fastness of the dyed wool fabrics treated with various dyes. |            |                  |     |                                      |        |                  |
|---------------------------------------------------------------------------------------------------------------------|------------|------------------|-----|--------------------------------------|--------|------------------|
| Dyes                                                                                                                | Methods    | Rubbing fastness |     | Washing fastness<br>(color staining) |        | Washing fastness |
|                                                                                                                     |            | Dry              | Wet | Wool                                 | Cotton | (color changing) |
|                                                                                                                     |            |                  |     |                                      |        |                  |
| Lanasol Blue CE                                                                                                     | Untreated  | 5                | 4-5 | 5                                    | 5      | 5                |
|                                                                                                                     | S-treated  | 4                | 3   | 5                                    | 5      | 5                |
|                                                                                                                     | U-treated  | 4-5              | 3   | 5                                    | 5      | 5                |
|                                                                                                                     | SU-treated | 4-5              | 3   | 5                                    | 5      | 5                |
| Lanaset Yellow 4GN                                                                                                  | Untreated  | 5                | 4-5 | 5                                    | 5      | 5                |
|                                                                                                                     | S-treated  | 4-5              | 3   | 5                                    | 5      | 5                |
|                                                                                                                     | U-treated  | 4-5              | 4   | 5                                    | 5      | 5                |
|                                                                                                                     | SU-treated | 4-5              | 3-4 | 5                                    | 5      | 5                |
| Lanaset Red G                                                                                                       | Untreated  | 5                | 4-5 | 5                                    | 5      | 5                |
|                                                                                                                     | S-treated  | 4-5              | 3   | 5                                    | 5      | 5                |
|                                                                                                                     | U-treated  | 4-5              | 3   | 5                                    | 5      | 5                |
|                                                                                                                     | SU-treated | 4-5              | 4   | 5                                    | 5      | 5                |
