# Supplementary figures and images for: A “wave-riding” biocatalysis: an all-enzyme system for genuinely green and flexible manufacture of machine-washable dyed wool fabrics
Source: Royal Society of Chemistry journal article supplement (doi:10.1039/d5gc01614b), 2025-01-01

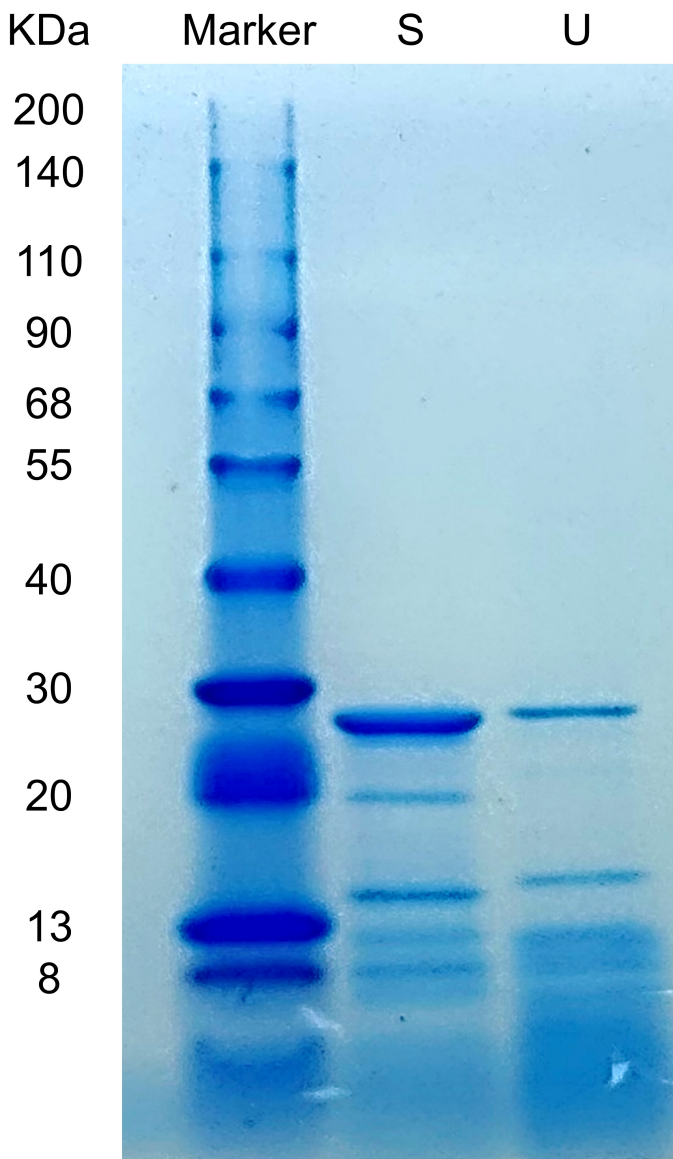

Supplement: d5gc01614b3.pdf [file d5gc01614b3.pdf]

a

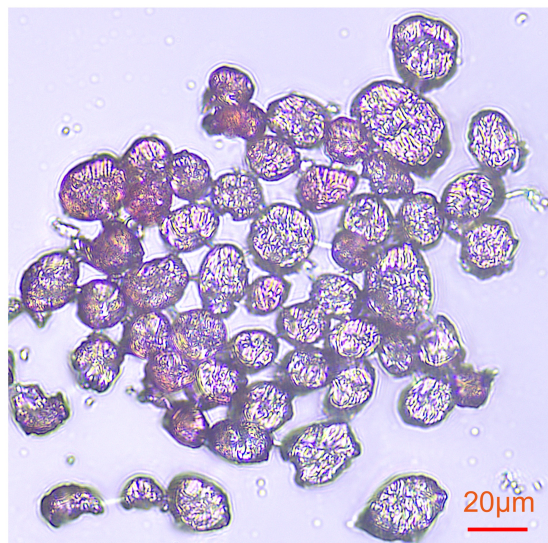

b

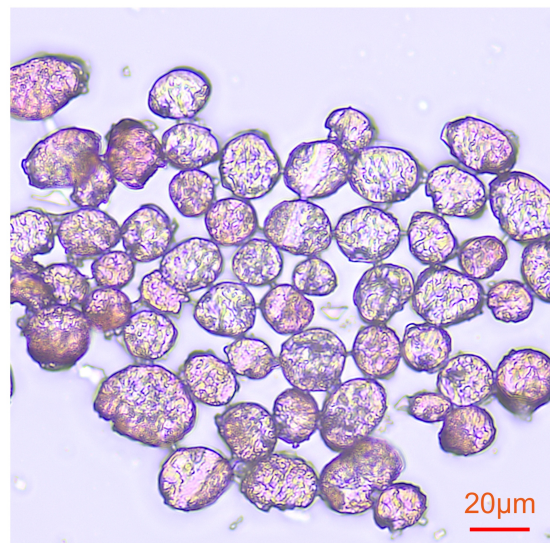

c

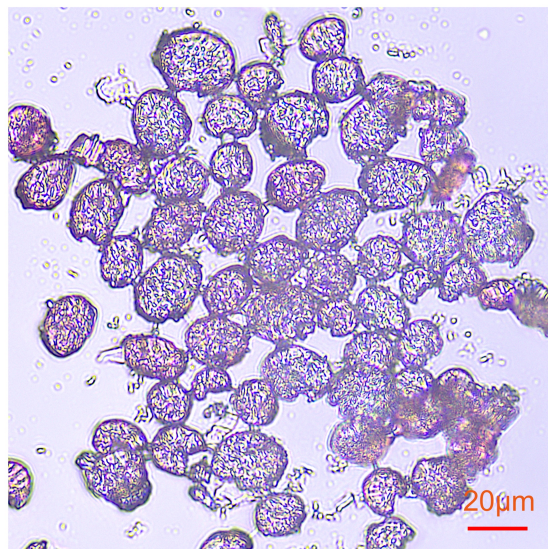

d

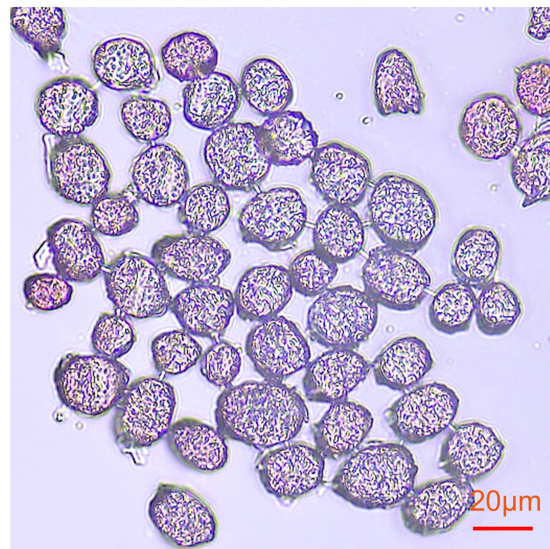

Supplement: d5gc01614b5.pdf [file d5gc01614b5.pdf]
